# Supplementary material for: Million Veteran Program’s response to COVID-19: Survey development and preliminary findings
Source: PubMed Central journal article supplement (PMC9037905; doi:10.1371/journal.pone.0266381), 2022-04-25
Supplement: pone.0266381.s001.pdf [file pone.0266381.s001.pdf]

## Section A: Demographics

### 1. What is today's date?

|                      |                      |   |                      |                      |   |                      |                      |                      |                      |
|----------------------|----------------------|---|----------------------|----------------------|---|----------------------|----------------------|----------------------|----------------------|
| <input type="text"/> | <input type="text"/> | / | <input type="text"/> | <input type="text"/> | / | <input type="text"/> | <input type="text"/> | <input type="text"/> | <input type="text"/> |
| mm                   |                      |   | dd                   |                      |   | yyyy                 |                      |                      |                      |

### 2. What is your date of birth?

|                      |                      |   |                      |                      |   |                      |                      |                      |                      |
|----------------------|----------------------|---|----------------------|----------------------|---|----------------------|----------------------|----------------------|----------------------|
| <input type="text"/> | <input type="text"/> | / | <input type="text"/> | <input type="text"/> | / | <input type="text"/> | <input type="text"/> | <input type="text"/> | <input type="text"/> |
| mm                   |                      |   | dd                   |                      |   | yyyy                 |                      |                      |                      |

### 3. What is your gender?

- Male       Prefer not to answer  
 Female

### 4. Are you Spanish, Hispanic, or Latino?

- No, not Spanish, Hispanic, Latino  
 Yes, Mexican, Mexican American, Chicano  
 Yes, Puerto Rican  
 Yes, Cuban  
 Yes, other Spanish, Hispanic, Latino

### 5. What is your race? (Mark all that apply)

- White       Japanese  
 Black / African - American       Asian Indian  
 Other Asian  
 American Indian / Alaska Native       Filipino  
 Pacific Islander  
 Chinese       Other

### 6. What is your highest degree or level of school you have completed?

- Less than high school  
 High school diploma / GED  
 Some college credit, but no degree  
 Associate's degree (e.g., AA, AS)  
 Bachelor's degree (e.g., BA, BS)  
 Master's degree (e.g., MA, MS, MBA)  
 Professional or Doctorate degree

### 7. What is your current marital status?

- Married       Divorced  
 Civil commitment       Widowed  
 Cohabiting       Never married  
 Separated

### 8. Including yourself, how many people currently live in your household?

- 1    2    3    4    5    6    7    8    9+

### 9. Which income category represents the total income of your household from all sources (before taxes and deductions) during the last 12 months?

- Less than \$10,000  
 \$10,000 - \$19,999  
 \$20,000 - \$29,999  
 \$30,000 - \$39,999  
 \$40,000 - \$49,999  
 \$50,000 - \$59,999  
 \$60,000 - \$74,999  
 \$75,000 - \$99,999  
 \$100,000 - \$149,999  
 \$150,000 or more  
 Prefer not to answer

### 10. What is your height:

feet  inches

### 11. What is your weight:

pounds

**12. In which branch of the service did you serve? (Mark all that apply)**

- |                                       |                                                |
|---------------------------------------|------------------------------------------------|
| <input type="checkbox"/> Army         | <input type="checkbox"/> National Guard        |
| <input type="checkbox"/> Navy         | <input type="checkbox"/> Merchant Marines      |
| <input type="checkbox"/> Air Force    | <input type="checkbox"/> NOAA                  |
| <input type="checkbox"/> Coast Guard  | <input type="checkbox"/> Public Health Service |
| <input type="checkbox"/> Marine Corps | <input type="checkbox"/> None (Skip to Qu. 15) |

**13. Please indicate whether your service was:**

- Active Duty  
 Reserves Only  
 Not Applicable (Not in the military)

**14. When did you serve? (Mark all that apply)**

- September 2001 or later  
 August 1990 to August 2001 (includes Gulf War)  
 May 1975 to July 1990  
 August 1964 to April 1975 (Vietnam era)  
 February 1955 to July 1964  
 July 1950 to January 1955 (Korean War)  
 January 1947 to June 1950  
 December 1941 to December 1946 (WWII)  
 November 1941 or earlier

**15. How often do you have a drink containing alcohol?**

- |                                                 |                                                  |
|-------------------------------------------------|--------------------------------------------------|
| <input type="checkbox"/> Never (Skip to Qu. 18) | <input type="checkbox"/> 2 – 3 days per week     |
| <input type="checkbox"/> 1 – 3 days per month   | <input type="checkbox"/> 4 – 5 days per week     |
| <input type="checkbox"/> 1 day per week         | <input type="checkbox"/> 6 or more days per week |

**16. How many drinks containing alcohol do you have on a typical day when you are drinking?**

- |                                 |                                 |                                     |
|---------------------------------|---------------------------------|-------------------------------------|
| <input type="checkbox"/> 1 or 2 | <input type="checkbox"/> 5 or 6 | <input type="checkbox"/> 10 or more |
| <input type="checkbox"/> 3 or 4 | <input type="checkbox"/> 7 to 9 |                                     |

**17. How often do you have six or more drinks on one occasion?**

- Never  
 Less than monthly  
 Monthly  
 2 – 3 times per week  
 4 or more times per week

**18. In your lifetime have you smoked a total of at least 100 cigarettes, cigars, or pipes?**

- Yes  No  (Skip to Qu. 21)

**19. Have you ever smoked daily or almost every day for at least one year?**

- Yes  No

**20. Do you smoke now?**

- Yes, daily  
 Yes, occasionally  
 Not at all

**The following questions concern electronic vaping products for nicotine use. Do not include marijuana use.**

**21. Have you ever used an e-cigarette or other electronic vaping product, even just one time, in your entire life?**

- Yes  
 No (Skip to Qu. 23)  
 Prefer not to answer (Skip to Qu. 23)  
 Don't know (Skip to Qu. 23)

**22. Do you NOW use e-cigarettes or other electronic vaping products every day, some days, or not at all?**

- Every day  
 Some days  
 Not at all  
 Prefer not to answer  
 Don't know

## Section B: COVID-19 Exposure/Household Contact

23. Have you been in close contact with anyone with COVID-19 like symptoms?

- Yes, I was in contact with a person with COVID-19 who was confirmed positive by a test
- Yes, I was in contact with a person with COVID-19 symptoms, but was not confirmed by a test
- No, not to my knowledge

24. Has anyone in your household had COVID-19? Please do not include yourself.

Yes 

Please indicate the number of people.

No

People

25. Are you a healthcare worker helping to manage patients with COVID-19?

Yes

Don't know

No

Prefer not to answer

## Section C: COVID-19 Symptoms/Diagnosis

26. Have you experienced any of the following symptoms (more than normal) since January 2020? Please check "Yes" or "No" next to each symptom.

| <i>If yes, please indicate the number of days you experienced any of these symptoms.</i> | No                       | Yes                                                                                                            | Number of Days You Experienced Symptom                         |
|------------------------------------------------------------------------------------------|--------------------------|----------------------------------------------------------------------------------------------------------------|----------------------------------------------------------------|
| a. Coughing a lot for more than an hour, or 3 or more coughing episodes in 24 hours      | <input type="checkbox"/> | <input type="checkbox"/>   | <input type="text"/> <input type="text"/> <input type="text"/> |
| b. Shortness of breath                                                                   | <input type="checkbox"/> | <input type="checkbox"/>  | <input type="text"/> <input type="text"/> <input type="text"/> |
| c. Unusual chest pain or tightness in your chest                                         | <input type="checkbox"/> | <input type="checkbox"/>  | <input type="text"/> <input type="text"/> <input type="text"/> |
| d. Fatigue (struggling to get out of bed)                                                | <input type="checkbox"/> | <input type="checkbox"/>  | <input type="text"/> <input type="text"/> <input type="text"/> |
| e. Feeling of heaviness in arms or legs                                                  | <input type="checkbox"/> | <input type="checkbox"/>  | <input type="text"/> <input type="text"/> <input type="text"/> |
| f. Headache                                                                              | <input type="checkbox"/> | <input type="checkbox"/>  | <input type="text"/> <input type="text"/> <input type="text"/> |
| g. Loss of sense of smell or taste                                                       | <input type="checkbox"/> | <input type="checkbox"/>  | <input type="text"/> <input type="text"/> <input type="text"/> |
| h. Sore throat                                                                           | <input type="checkbox"/> | <input type="checkbox"/>  | <input type="text"/> <input type="text"/> <input type="text"/> |
| i. Diarrhea, nausea and/or vomiting                                                      | <input type="checkbox"/> | <input type="checkbox"/>  | <input type="text"/> <input type="text"/> <input type="text"/> |
| j. Fever/chills (temp > 100.4 Fahrenheit)                                                | <input type="checkbox"/> | <input type="checkbox"/>  | <input type="text"/> <input type="text"/> <input type="text"/> |

**27. Did you seek advice from a healthcare professional for these symptoms?**

Yes 

No  
(Skip to  
Qu. 41)

a. If yes, where did you seek care? (Mark all that apply)

- VA facility
- Doctor's office
- Emergency department
- Telemedicine/telephone triage
- Health department/public health clinic
- Retail clinic/pharmacy
- Urgent care
- Other

b. If yes, how long after your symptoms started did you seek care?

- Less than 2 days
- 2 - 7 days
- Greater than 1 week

**28. Did doctors use a laboratory test to check that you didn't have influenza (Flu)?**

- Yes
- No
- Don't know

**29. Have you been diagnosed with COVID-19?**

- Yes, confirmed by a positive laboratory test
- Yes, suspected by a doctor but not confirmed by a test (Skip to Qu. 41)
- No (Skip to Qu. 41)

**30. Do you know what type of laboratory test you had for COVID-19?**

- Yes, by nasal swab (PCR)
- Yes, by blood test (antibody)
- Yes, by another test
- Don't know

**31. Is there a suspected source of your COVID-19?**

- Travel related
- Family member was sick
- Coworker or other work contact was sick
- Friend or other social contact was sick
- Don't know
- Prefer not to answer

**Section D: COVID-19 Hospitalization/Treatment**

**32. Were you hospitalized for treatment of COVID-19?**

- Yes
- No (Skip to Qu. 38)

**33. Were you hospitalized at a VA facility?**

- Yes
- No

**34. What date were you admitted to the hospital for treatment of COVID-19?**

|    |  |   |    |  |   |      |  |  |  |
|----|--|---|----|--|---|------|--|--|--|
|    |  | / |    |  | / |      |  |  |  |
| mm |  |   | dd |  |   | yyyy |  |  |  |

**35. What date were you discharged from the hospital after treatment of COVID-19?**

|    |  |   |    |  |   |      |  |  |  |
|----|--|---|----|--|---|------|--|--|--|
|    |  | / |    |  | / |      |  |  |  |
| mm |  |   | dd |  |   | yyyy |  |  |  |

**36. Did you require a breathing tube through the mouth for respiratory support while in the hospital (intubation / mechanical ventilation / respirator)?**

- Yes
- No

**37. Were you hospitalized in an Intensive Care Unit (ICU) for treatment of COVID-19?**

- Yes
- No
- Don't know

**38. Do you know if doctors used any of the following medications to treat your illness while you were sick with COVID-19? (Mark all that apply)**

- Tamiflu (oseltamivir) or Xofluza (baloxavir marboxil)
- Chloroquine or Hydroxychloroquine
- Azithromycin
- Kevzara (sarilumab), Actemra (tocilizumab), Sylvant (siltuximab) or another IL6 pathway blocker medication
- Baricitinib (Olmiant), Ruxolitinib (Jakafi), tofacitinib (XELJANZ), fedratinib (Inrebic) or another JAK inhibitor medication
- Remdesivir (GS-5735)
- Darunavir (Prezista), Lopinavir/Ritonavir (Kaletra) or another protease inhibitor
- Favipiravir (Avigan)
- Sofosbuvir or ribavirin
- None of the above
- Don't know

**39. Did you receive respiratory support at home to treat your COVID-19, such as oxygen therapy by nasal prong or facemask or CPAP machine?**

- Yes
- No → (Skip to Qu. 41)

**40. If yes, for how long did you need respiratory support at home? Please enter the duration of your respiratory support in days.**

|  |      |
|--|------|
|  | days |
|--|------|

## Section E: COVID-19 Impact Behavior/Well-Being

The next questions ask about your behaviors and well-being since the COVID-19 pandemic and the impact it has had on you.

**41. Which of the following have you done since the COVID-19 pandemic? (Mark all that apply)**

- |                                                                                                                |                                                                                                         |
|----------------------------------------------------------------------------------------------------------------|---------------------------------------------------------------------------------------------------------|
| <input type="checkbox"/> Used a face mask or other face covering while in public                               | <input type="checkbox"/> Practiced social distancing (avoiding contact with anyone outside of the home) |
| <input type="checkbox"/> Used gloves while in public                                                           | <input type="checkbox"/> Avoided contact with people who could be high-risk                             |
| <input type="checkbox"/> Washed your hands with soap or used hand sanitizer several times a day                | <input type="checkbox"/> Avoided eating at restaurants                                                  |
| <input type="checkbox"/> Cleaned high touch surfaces like door handles, counters, faucets, and remote controls | <input type="checkbox"/> Avoided public spaces, gatherings, or crowds                                   |
|                                                                                                                | <input type="checkbox"/> Avoided gatherings of more than 50 people                                      |
|                                                                                                                | <input type="checkbox"/> Cancelled doctor's appointments                                                |

**42. Since the COVID-19 pandemic started, have any of the following aspects of your life changed?**

|    |                                                  | Decreased                | Stayed the Same          | Increased                | Not Applicable           |
|----|--------------------------------------------------|--------------------------|--------------------------|--------------------------|--------------------------|
| a. | Amount you sleep                                 | <input type="checkbox"/> | <input type="checkbox"/> | <input type="checkbox"/> | <input type="checkbox"/> |
| b. | Amount of physical activity you do               | <input type="checkbox"/> | <input type="checkbox"/> | <input type="checkbox"/> | <input type="checkbox"/> |
| c. | Amount you smoke/vape                            | <input type="checkbox"/> | <input type="checkbox"/> | <input type="checkbox"/> | <input type="checkbox"/> |
| d. | Amount of alcohol you drink                      | <input type="checkbox"/> | <input type="checkbox"/> | <input type="checkbox"/> | <input type="checkbox"/> |
| e. | Number of hours you work in usual workplace      | <input type="checkbox"/> | <input type="checkbox"/> | <input type="checkbox"/> | <input type="checkbox"/> |
| f. | Number of hours you work at home                 | <input type="checkbox"/> | <input type="checkbox"/> | <input type="checkbox"/> | <input type="checkbox"/> |
| g. | Time spent talking to family/friends             | <input type="checkbox"/> | <input type="checkbox"/> | <input type="checkbox"/> | <input type="checkbox"/> |
| h. | Time spent talking to work colleagues            | <input type="checkbox"/> | <input type="checkbox"/> | <input type="checkbox"/> | <input type="checkbox"/> |
| i. | Practicing relaxation / mindfulness / meditation | <input type="checkbox"/> | <input type="checkbox"/> | <input type="checkbox"/> | <input type="checkbox"/> |
| j. | Time watching TV/streaming services              | <input type="checkbox"/> | <input type="checkbox"/> | <input type="checkbox"/> | <input type="checkbox"/> |
| k. | Time spent reading or listening to the news      | <input type="checkbox"/> | <input type="checkbox"/> | <input type="checkbox"/> | <input type="checkbox"/> |
| l. | Time spent on social media                       | <input type="checkbox"/> | <input type="checkbox"/> | <input type="checkbox"/> | <input type="checkbox"/> |
| m. | Time spent playing video games                   | <input type="checkbox"/> | <input type="checkbox"/> | <input type="checkbox"/> | <input type="checkbox"/> |
| n. | Time spent doing hobbies/things you enjoy        | <input type="checkbox"/> | <input type="checkbox"/> | <input type="checkbox"/> | <input type="checkbox"/> |
| o. | Amount you eat                                   | <input type="checkbox"/> | <input type="checkbox"/> | <input type="checkbox"/> | <input type="checkbox"/> |
| p. | Amount of money you've spent                     | <input type="checkbox"/> | <input type="checkbox"/> | <input type="checkbox"/> | <input type="checkbox"/> |

43. Over the past 2 weeks, have you been bothered by any of these problems?

|    |                                             | Not at all               | Several days             | More days than not       | Nearly every day         |
|----|---------------------------------------------|--------------------------|--------------------------|--------------------------|--------------------------|
| a. | Feeling nervous, anxious, or on edge        | <input type="checkbox"/> | <input type="checkbox"/> | <input type="checkbox"/> | <input type="checkbox"/> |
| b. | Not being able to stop or control worrying  | <input type="checkbox"/> | <input type="checkbox"/> | <input type="checkbox"/> | <input type="checkbox"/> |
| c. | Feeling down, depressed, or hopeless        | <input type="checkbox"/> | <input type="checkbox"/> | <input type="checkbox"/> | <input type="checkbox"/> |
| d. | Little interest or pleasure in doing things | <input type="checkbox"/> | <input type="checkbox"/> | <input type="checkbox"/> | <input type="checkbox"/> |

44. Since the COVID-19 pandemic, for each of the statements below please select the best choice that describes how you feel. *Select only one response for each question or statement.*

|                         |                                                      | Never                    | Rarely                   | Sometimes                | Usually                  | Always                   | Don't know or N/A        |
|-------------------------|------------------------------------------------------|--------------------------|--------------------------|--------------------------|--------------------------|--------------------------|--------------------------|
| <b>Social Isolation</b> |                                                      |                          |                          |                          |                          |                          |                          |
| a.                      | I feel left out...                                   | <input type="checkbox"/> | <input type="checkbox"/> | <input type="checkbox"/> | <input type="checkbox"/> | <input type="checkbox"/> | <input type="checkbox"/> |
| b.                      | I feel that people barely know me...                 | <input type="checkbox"/> | <input type="checkbox"/> | <input type="checkbox"/> | <input type="checkbox"/> | <input type="checkbox"/> | <input type="checkbox"/> |
| c.                      | I feel isolated from others...                       | <input type="checkbox"/> | <input type="checkbox"/> | <input type="checkbox"/> | <input type="checkbox"/> | <input type="checkbox"/> | <input type="checkbox"/> |
| d.                      | I feel that people are around me, but not with me... | <input type="checkbox"/> | <input type="checkbox"/> | <input type="checkbox"/> | <input type="checkbox"/> | <input type="checkbox"/> | <input type="checkbox"/> |

45. Since the COVID-19 pandemic, for each of the statements below please select the best choice that describes how you feel. *Select only one response for each question or statement.*

|                          |                                                                      | Never                    | Rarely                   | Sometimes                | Usually                  | Always                   | Don't know or N/A        |
|--------------------------|----------------------------------------------------------------------|--------------------------|--------------------------|--------------------------|--------------------------|--------------------------|--------------------------|
| <b>Emotional Support</b> |                                                                      |                          |                          |                          |                          |                          |                          |
| a.                       | I have someone who will listen to me when I need to talk.            | <input type="checkbox"/> | <input type="checkbox"/> | <input type="checkbox"/> | <input type="checkbox"/> | <input type="checkbox"/> | <input type="checkbox"/> |
| b.                       | I have someone to confide in or talk to about myself or my problems. | <input type="checkbox"/> | <input type="checkbox"/> | <input type="checkbox"/> | <input type="checkbox"/> | <input type="checkbox"/> | <input type="checkbox"/> |
| c.                       | I have someone who makes me feel appreciated.                        | <input type="checkbox"/> | <input type="checkbox"/> | <input type="checkbox"/> | <input type="checkbox"/> | <input type="checkbox"/> | <input type="checkbox"/> |
| d.                       | I have someone to talk with when I have a bad day.                   | <input type="checkbox"/> | <input type="checkbox"/> | <input type="checkbox"/> | <input type="checkbox"/> | <input type="checkbox"/> | <input type="checkbox"/> |

46. Since the COVID-19 pandemic, for each of the items below please select the best choice describing the degree of impact. *Select only one response for each question or statement.*

|    |                                                                | No Loss                  | Minimal Loss             | Noticeable Loss          | Extreme Loss             | Don't Know or N/A        |
|----|----------------------------------------------------------------|--------------------------|--------------------------|--------------------------|--------------------------|--------------------------|
| a. | Adequate food                                                  | <input type="checkbox"/> | <input type="checkbox"/> | <input type="checkbox"/> | <input type="checkbox"/> | <input type="checkbox"/> |
| b. | Your residence / home you live in                              | <input type="checkbox"/> | <input type="checkbox"/> | <input type="checkbox"/> | <input type="checkbox"/> | <input type="checkbox"/> |
| c. | Things you need for your children or members of your household | <input type="checkbox"/> | <input type="checkbox"/> | <input type="checkbox"/> | <input type="checkbox"/> | <input type="checkbox"/> |
| d. | Money for extras                                               | <input type="checkbox"/> | <input type="checkbox"/> | <input type="checkbox"/> | <input type="checkbox"/> | <input type="checkbox"/> |
| e. | Savings or emergency money                                     | <input type="checkbox"/> | <input type="checkbox"/> | <input type="checkbox"/> | <input type="checkbox"/> | <input type="checkbox"/> |
| f. | Adequate income                                                | <input type="checkbox"/> | <input type="checkbox"/> | <input type="checkbox"/> | <input type="checkbox"/> | <input type="checkbox"/> |
| g. | Financial credit                                               | <input type="checkbox"/> | <input type="checkbox"/> | <input type="checkbox"/> | <input type="checkbox"/> | <input type="checkbox"/> |
| h. | Your retirement security                                       | <input type="checkbox"/> | <input type="checkbox"/> | <input type="checkbox"/> | <input type="checkbox"/> | <input type="checkbox"/> |
| i. | Free time                                                      | <input type="checkbox"/> | <input type="checkbox"/> | <input type="checkbox"/> | <input type="checkbox"/> | <input type="checkbox"/> |
| j. | Time for enough sleep                                          | <input type="checkbox"/> | <input type="checkbox"/> | <input type="checkbox"/> | <input type="checkbox"/> | <input type="checkbox"/> |
| k. | Feeling valuable to other people                               | <input type="checkbox"/> | <input type="checkbox"/> | <input type="checkbox"/> | <input type="checkbox"/> | <input type="checkbox"/> |
| l. | A feeling of intimacy with one or more family members          | <input type="checkbox"/> | <input type="checkbox"/> | <input type="checkbox"/> | <input type="checkbox"/> | <input type="checkbox"/> |
| m. | The feeling that you're accomplishing the goals in your life   | <input type="checkbox"/> | <input type="checkbox"/> | <input type="checkbox"/> | <input type="checkbox"/> | <input type="checkbox"/> |
| n. | Time with your loved ones                                      | <input type="checkbox"/> | <input type="checkbox"/> | <input type="checkbox"/> | <input type="checkbox"/> | <input type="checkbox"/> |
| o. | The sense of a daily routine                                   | <input type="checkbox"/> | <input type="checkbox"/> | <input type="checkbox"/> | <input type="checkbox"/> | <input type="checkbox"/> |
| p. | Health of a family member / friend                             | <input type="checkbox"/> | <input type="checkbox"/> | <input type="checkbox"/> | <input type="checkbox"/> | <input type="checkbox"/> |
| q. | Stable employment                                              | <input type="checkbox"/> | <input type="checkbox"/> | <input type="checkbox"/> | <input type="checkbox"/> | <input type="checkbox"/> |
| r. | Ability to organize tasks                                      | <input type="checkbox"/> | <input type="checkbox"/> | <input type="checkbox"/> | <input type="checkbox"/> | <input type="checkbox"/> |
| s. | Time needed to do your work                                    | <input type="checkbox"/> | <input type="checkbox"/> | <input type="checkbox"/> | <input type="checkbox"/> | <input type="checkbox"/> |
| t. | Understanding from your boss                                   | <input type="checkbox"/> | <input type="checkbox"/> | <input type="checkbox"/> | <input type="checkbox"/> | <input type="checkbox"/> |
| u. | Support from your co-workers                                   | <input type="checkbox"/> | <input type="checkbox"/> | <input type="checkbox"/> | <input type="checkbox"/> | <input type="checkbox"/> |
| v. | The chance to get more training or education                   | <input type="checkbox"/> | <input type="checkbox"/> | <input type="checkbox"/> | <input type="checkbox"/> | <input type="checkbox"/> |



|     | <b><i>Continued</i></b>                              | No Loss                  | Minimal Loss             | Noticeable Loss          | Extreme Loss             | Don't Know or N/A        |
|-----|------------------------------------------------------|--------------------------|--------------------------|--------------------------|--------------------------|--------------------------|
| w.  | <b>Feeling of being independent</b>                  | <input type="checkbox"/> | <input type="checkbox"/> | <input type="checkbox"/> | <input type="checkbox"/> | <input type="checkbox"/> |
| x.  | <b>Companionship with others</b>                     | <input type="checkbox"/> | <input type="checkbox"/> | <input type="checkbox"/> | <input type="checkbox"/> | <input type="checkbox"/> |
| y.  | <b>Feeling that your life has meaning or purpose</b> | <input type="checkbox"/> | <input type="checkbox"/> | <input type="checkbox"/> | <input type="checkbox"/> | <input type="checkbox"/> |
| z.  | <b>Involvement with your church</b>                  | <input type="checkbox"/> | <input type="checkbox"/> | <input type="checkbox"/> | <input type="checkbox"/> | <input type="checkbox"/> |
| aa. | <b>Help with tasks at home</b>                       | <input type="checkbox"/> | <input type="checkbox"/> | <input type="checkbox"/> | <input type="checkbox"/> | <input type="checkbox"/> |
| bb. | <b>Loyalty of friends</b>                            | <input type="checkbox"/> | <input type="checkbox"/> | <input type="checkbox"/> | <input type="checkbox"/> | <input type="checkbox"/> |
| cc. | <b>Help with childcare</b>                           | <input type="checkbox"/> | <input type="checkbox"/> | <input type="checkbox"/> | <input type="checkbox"/> | <input type="checkbox"/> |
| dd. | <b>Involvement in organizations or clubs</b>         | <input type="checkbox"/> | <input type="checkbox"/> | <input type="checkbox"/> | <input type="checkbox"/> | <input type="checkbox"/> |

## Section F: Medical Conditions/Comorbidity

47. We'd like to ask about your general health. Please tell us if you have ever been diagnosed with the following conditions. Check the appropriate box and indicate the year of diagnosis and whether you currently take any medication(s) ("TAKE MEDS") for that condition. (Mark all that apply)

| Circulatory System Problems                                |                          |                      |                          | Mental Health Disorders                                     |                          |                      |                          |
|------------------------------------------------------------|--------------------------|----------------------|--------------------------|-------------------------------------------------------------|--------------------------|----------------------|--------------------------|
|                                                            | YES                      | YEAR<br>DIAGNOSED    | TAKE<br>MEDS             |                                                             | YES                      | YEAR<br>DIAGNOSED    | TAKE<br>MEDS             |
| High blood pressure (Hypertension)                         | <input type="checkbox"/> | <input type="text"/> | <input type="checkbox"/> | Anxiety reaction / Panic disorder                           | <input type="checkbox"/> | <input type="text"/> | <input type="checkbox"/> |
| Stroke                                                     | <input type="checkbox"/> | <input type="text"/> | <input type="checkbox"/> | Attention deficit hyper-activity disorder (ADHD)            | <input type="checkbox"/> | <input type="text"/> | <input type="checkbox"/> |
| Transient ischemic attack (TIA)                            | <input type="checkbox"/> | <input type="text"/> | <input type="checkbox"/> | Bipolar disorder                                            | <input type="checkbox"/> | <input type="text"/> | <input type="checkbox"/> |
| Heart attack                                               | <input type="checkbox"/> | <input type="text"/> | <input type="checkbox"/> | Post traumatic stress disorder (PTSD)                       | <input type="checkbox"/> | <input type="text"/> | <input type="checkbox"/> |
| Coronary artery / Coronary heart disease (includes angina) | <input type="checkbox"/> | <input type="text"/> | <input type="checkbox"/> | Depression                                                  | <input type="checkbox"/> | <input type="text"/> | <input type="checkbox"/> |
| Peripheral vascular disease                                | <input type="checkbox"/> | <input type="text"/> | <input type="checkbox"/> | Eating disorder                                             | <input type="checkbox"/> | <input type="text"/> | <input type="checkbox"/> |
| High cholesterol                                           | <input type="checkbox"/> | <input type="text"/> | <input type="checkbox"/> | Personality disorder                                        | <input type="checkbox"/> | <input type="text"/> | <input type="checkbox"/> |
| Pulmonary embolism or deep vein thrombosis (DVT)           | <input type="checkbox"/> | <input type="text"/> | <input type="checkbox"/> | Schizophrenia                                               | <input type="checkbox"/> | <input type="text"/> | <input type="checkbox"/> |
| Congestive heart failure                                   | <input type="checkbox"/> | <input type="text"/> | <input type="checkbox"/> | Social phobia                                               | <input type="checkbox"/> | <input type="text"/> | <input type="checkbox"/> |
| Other circulatory system problem                           | <input type="checkbox"/> | <input type="text"/> | <input type="checkbox"/> | Other mental health disorder                                | <input type="checkbox"/> | <input type="text"/> | <input type="checkbox"/> |
| Skeletal / Muscular Problems                               |                          |                      |                          | Hearing / Vision                                            |                          |                      |                          |
|                                                            | YES                      | YEAR<br>DIAGNOSED    | TAKE<br>MEDS             |                                                             | YES                      | YEAR<br>DIAGNOSED    | TAKE<br>MEDS             |
| Osteoarthritis                                             | <input type="checkbox"/> | <input type="text"/> | <input type="checkbox"/> | Cataracts                                                   | <input type="checkbox"/> | <input type="text"/> | <input type="checkbox"/> |
| Rheumatoid arthritis                                       | <input type="checkbox"/> | <input type="text"/> | <input type="checkbox"/> | Glaucoma                                                    | <input type="checkbox"/> | <input type="text"/> | <input type="checkbox"/> |
| Other arthritis                                            | <input type="checkbox"/> | <input type="text"/> | <input type="checkbox"/> | Macular degeneration                                        | <input type="checkbox"/> | <input type="text"/> | <input type="checkbox"/> |
| Gout                                                       | <input type="checkbox"/> | <input type="text"/> | <input type="checkbox"/> | Blindness, all causes                                       | <input type="checkbox"/> | <input type="text"/> | <input type="checkbox"/> |
| Osteoporosis                                               | <input type="checkbox"/> | <input type="text"/> | <input type="checkbox"/> | Tinnitus or ringing in the ears                             | <input type="checkbox"/> | <input type="text"/> | <input type="checkbox"/> |
| Other skeletal / muscular problem                          | <input type="checkbox"/> | <input type="text"/> | <input type="checkbox"/> | Severe hearing loss or partial deafness in one or both ears | <input type="checkbox"/> | <input type="text"/> | <input type="checkbox"/> |

| Infectious Diseases                              |                          |                      |                          | Cancer                                                     |                          |                      |                          |
|--------------------------------------------------|--------------------------|----------------------|--------------------------|------------------------------------------------------------|--------------------------|----------------------|--------------------------|
|                                                  | YES                      | YEAR<br>DIAGNOSED    | TAKE<br>MEDS             |                                                            | YES                      | YEAR<br>DIAGNOSED    | TAKE<br>MEDS             |
| Tuberculosis                                     | <input type="checkbox"/> | <input type="text"/> | <input type="checkbox"/> | Breast cancer                                              | <input type="checkbox"/> | <input type="text"/> | <input type="checkbox"/> |
| Hepatitis C                                      | <input type="checkbox"/> | <input type="text"/> | <input type="checkbox"/> | Colon cancer /<br>Rectal cancer                            | <input type="checkbox"/> | <input type="text"/> | <input type="checkbox"/> |
| HIV / AIDS                                       | <input type="checkbox"/> | <input type="text"/> | <input type="checkbox"/> | Lung cancer                                                | <input type="checkbox"/> | <input type="text"/> | <input type="checkbox"/> |
| Other infectious disease                         | <input type="checkbox"/> | <input type="text"/> | <input type="checkbox"/> | Prostate cancer                                            | <input type="checkbox"/> | <input type="text"/> | <input type="checkbox"/> |
| Kidney Disease                                   |                          |                      |                          | Skin cancer                                                | <input type="checkbox"/> | <input type="text"/> | <input type="checkbox"/> |
|                                                  | YES                      | YEAR<br>DIAGNOSED    | TAKE<br>MEDS             | Other cancer                                               | <input type="checkbox"/> | <input type="text"/> | <input type="checkbox"/> |
| Kidney disease without<br>dialysis               | <input type="checkbox"/> | <input type="text"/> | <input type="checkbox"/> | Nervous System Problems                                    |                          |                      |                          |
| Kidney disease with<br>dialysis                  | <input type="checkbox"/> | <input type="text"/> | <input type="checkbox"/> |                                                            | YES                      | YEAR<br>DIAGNOSED    | TAKE<br>MEDS             |
| Acute kidney disease with<br>no current dialysis | <input type="checkbox"/> | <input type="text"/> | <input type="checkbox"/> | Migraine headaches                                         | <input type="checkbox"/> | <input type="text"/> | <input type="checkbox"/> |
| Digestive System Problems                        |                          |                      |                          | Other headaches                                            | <input type="checkbox"/> | <input type="text"/> | <input type="checkbox"/> |
|                                                  | YES                      | YEAR<br>DIAGNOSED    | TAKE<br>MEDS             | Memory loss or<br>impairment                               | <input type="checkbox"/> | <input type="text"/> | <input type="checkbox"/> |
| Acid reflux / GERD                               | <input type="checkbox"/> | <input type="text"/> | <input type="checkbox"/> | Dementia (includes<br>Alzheimer's, vascular,<br>etc.)      | <input type="checkbox"/> | <input type="text"/> | <input type="checkbox"/> |
| Peptic ulcers                                    | <input type="checkbox"/> | <input type="text"/> | <input type="checkbox"/> | Concussion or loss of<br>consciousness                     | <input type="checkbox"/> | <input type="text"/> | <input type="checkbox"/> |
| Bowel obstruction                                | <input type="checkbox"/> | <input type="text"/> | <input type="checkbox"/> | Traumatic brain injury                                     | <input type="checkbox"/> | <input type="text"/> | <input type="checkbox"/> |
| Colon polyps                                     | <input type="checkbox"/> | <input type="text"/> | <input type="checkbox"/> | Spinal cord injury or<br>impairment                        | <input type="checkbox"/> | <input type="text"/> | <input type="checkbox"/> |
| Irritable bowel<br>syndrome (IBS)                | <input type="checkbox"/> | <input type="text"/> | <input type="checkbox"/> | Epilepsy / Seizure                                         | <input type="checkbox"/> | <input type="text"/> | <input type="checkbox"/> |
| Ulcerative colitis                               | <input type="checkbox"/> | <input type="text"/> | <input type="checkbox"/> | Parkinson's disease                                        | <input type="checkbox"/> | <input type="text"/> | <input type="checkbox"/> |
| Crohn's disease                                  | <input type="checkbox"/> | <input type="text"/> | <input type="checkbox"/> | Amyotrophic lateral<br>sclerosis (Lou Gehrig's<br>disease) | <input type="checkbox"/> | <input type="text"/> | <input type="checkbox"/> |
| Celiac disease / Sprue                           | <input type="checkbox"/> | <input type="text"/> | <input type="checkbox"/> | Multiple sclerosis                                         | <input type="checkbox"/> | <input type="text"/> | <input type="checkbox"/> |
| Other digestive system<br>disorder               | <input type="checkbox"/> | <input type="text"/> | <input type="checkbox"/> | Other nervous system<br>problem                            | <input type="checkbox"/> | <input type="text"/> | <input type="checkbox"/> |

## Other Conditions

|                                                            | YES                      | YEAR<br>DIAGNOSED                                                                   | TAKE<br>MEDS             |
|------------------------------------------------------------|--------------------------|-------------------------------------------------------------------------------------|--------------------------|
| Asthma                                                     | <input type="checkbox"/> | <input type="text"/> <input type="text"/> <input type="text"/> <input type="text"/> | <input type="checkbox"/> |
| Chronic lung disease<br>(COPD, Emphysema or<br>Bronchitis) | <input type="checkbox"/> | <input type="text"/> <input type="text"/> <input type="text"/> <input type="text"/> | <input type="checkbox"/> |
| Diabetes / "sugar"                                         | <input type="checkbox"/> | <input type="text"/> <input type="text"/> <input type="text"/> <input type="text"/> | <input type="checkbox"/> |
| Enlarged prostate (Benign<br>prostatic hyperplasia)        | <input type="checkbox"/> | <input type="text"/> <input type="text"/> <input type="text"/> <input type="text"/> | <input type="checkbox"/> |
| Liver condition<br>(e.g., Cirrhosis)                       | <input type="checkbox"/> | <input type="text"/> <input type="text"/> <input type="text"/> <input type="text"/> | <input type="checkbox"/> |
| Skin condition (e.g.,<br>Eczema, Psoriasis)                | <input type="checkbox"/> | <input type="text"/> <input type="text"/> <input type="text"/> <input type="text"/> | <input type="checkbox"/> |
| Sleep apnea                                                | <input type="checkbox"/> | <input type="text"/> <input type="text"/> <input type="text"/> <input type="text"/> | <input type="checkbox"/> |
| Thyroid problems                                           | <input type="checkbox"/> | <input type="text"/> <input type="text"/> <input type="text"/> <input type="text"/> | <input type="checkbox"/> |
| Gulf War Illness/<br>Syndrome                              | <input type="checkbox"/> | <input type="text"/> <input type="text"/> <input type="text"/> <input type="text"/> | <input type="checkbox"/> |
| Chronic Fatigue Syndrome                                   | <input type="checkbox"/> | <input type="text"/> <input type="text"/> <input type="text"/> <input type="text"/> | <input type="checkbox"/> |
| Fibromyalgia                                               | <input type="checkbox"/> | <input type="text"/> <input type="text"/> <input type="text"/> <input type="text"/> | <input type="checkbox"/> |
| Other disease / disorder                                   | <input type="checkbox"/> | <input type="text"/> <input type="text"/> <input type="text"/> <input type="text"/> | <input type="checkbox"/> |

48. Did you receive the following vaccines while in the military? If yes, please write in the year of the last vaccine dose.

**Anthrax**

Yes → Year Vaccinated:

- No
- Don't Know

**Small Pox**

Yes → Year Vaccinated:

- No
- Don't Know

**Rabies**

Yes → Year Vaccinated:

- No
- Don't Know

**Yellow Fever**

Yes → Year Vaccinated:

- No
- Don't Know

**Typhoid**

Yes → Year Vaccinated:

- No
- Don't Know

**Japanese Encephalitis**

Yes → Year Vaccinated:

- No
- Don't Know

49. In general, would you say your health is:

- Excellent
- Very Good
- Good
- Fair
- Poor

50. In the PAST YEAR, have you received health care that was paid for by any of the following insurance types? (Mark all that apply)

- Private insurance
- TRICARE
- Medicare
- Medicaid
- Veterans Choice Program
- VA health care
- Indian Health

51. In the PAST YEAR, about how much of your health care did you get at a VA facility (e.g., doctor's visits, hospitalizations, urgent care visits, or counseling)?

- None
- 1 - 25%
- 26 - 50%
- 51 - 75%
- 76 - 99%
- 100%

52. In the PAST YEAR, how many times were you a patient in a hospital overnight or longer?

**VA Facility**

- None
- 1 - 3
- 4 - 6
- 7 - 9
- 10 or more

**Non-VA Healthcare Facility**

- None
- 1 - 3
- 4 - 6
- 7 - 9
- 10 or more

53. How many prescription medications do you currently receive from:

**VA Pharmacy**

None       4 - 6       10 or more

1 - 3       7 - 9

**Non-VA Pharmacy**

None       4 - 6       10 or more

1 - 3       7 - 9

54. How many non-prescription medications do you currently receive from:

**VA Pharmacy**

None       4 - 6       10 or more

1 - 3       7 - 9

**Non-VA Pharmacy**

None       4 - 6       10 or more

1 - 3       7 - 9
